# Supplementary material
Source: PubMed Central journal article supplement (PMC10101239)
Supplement: NIHMS1885741-supplement-Supplement.pdf [file NIHMS1885741-supplement-Supplement.pdf]

# Supplementary Material

## Search Terms

((("potentially harmful medication\*" [Title/Abstract] OR "potentially inappropriate medication\*" [Title/Abstract] OR "potentially inappropriate prescription\*" [Title/Abstract] OR "Beers Criteria" [Text Word] OR "Potentially Inappropriate Medication List" [MeSH Terms] OR "Inappropriate Prescribing" [MeSH Terms]))

AND

("nursing home\*" [Title/Abstract] OR "nursing facilit\*" [Title/Abstract] OR "Long term care" [Title/Abstract] OR "Nursing care" [Title/Abstract] OR "assisted living facilit\*" [Title/Abstract] OR "homes for the aged" [Title/Abstract] OR "Nursing Homes" [MeSH Terms] OR "homes for the aged" [MeSH Terms])

AND

"2011/04/07 00:00": "3000/01/01 05:00" [Date - Publication])

OR

((("nursing home\*" [Title/Abstract] OR "nursing facilit\*" [Title/Abstract] OR "Long term care" [Title/Abstract] OR "Nursing care" [Title/Abstract] OR "assisted living facilit\*" [Title/Abstract] OR "homes for the aged" [Title/Abstract] OR "Nursing Homes" [MeSH Terms] OR "homes for the aged" [MeSH Terms]))

AND

("antipsychotic\*" [Text Word] OR "neuroleptic\*" [Text Word] OR "Antipsychotic Agents" [MeSH Terms] OR "Benzodiazepines" [MeSH Terms] OR "sedative\*" [Text Word] OR "tranquilliser\*" [Text Word] OR "tranquillizer\*" [Text Word] OR "Hypnotics and Sedatives" [MeSH Terms] OR "anticholinergic\*" [Text Word] OR "Cholinergic Antagonists" [MeSH Terms] OR ("Alzheimer's" [Text Word] OR "Alzheimer Disease" [MeSH Terms] OR "Dementia" [MeSH Terms]) AND ("potentially harmful medication\*" [Title/Abstract] OR "potentially inappropriate medication\*" [Title/Abstract] OR "potentially inappropriate prescription\*" [Title/Abstract] OR "Beers Criteria" [Text Word] OR "Potentially Inappropriate Medication List" [MeSH Terms])))

AND

"2011/04/07 00:00": "3000/01/01 05:00" [Date - Publication])

AND

(y\_10 [Filter])

| Items | Section                          | PRISMA-ScR Checklist Item                                                                                                                                                                                                                                                                               | Reported                                                           |
|-------|----------------------------------|---------------------------------------------------------------------------------------------------------------------------------------------------------------------------------------------------------------------------------------------------------------------------------------------------------|--------------------------------------------------------------------|
|       | Title                            |                                                                                                                                                                                                                                                                                                         |                                                                    |
| 1     | Title                            | Identify the Report as a scoping review                                                                                                                                                                                                                                                                 | Title Page                                                         |
|       | Abstract                         |                                                                                                                                                                                                                                                                                                         |                                                                    |
| 2     | Abstract                         | Provide a structured summary that includes (as applicable): background, objectives, eligibility criteria, sources of evidence, charting methods, results, and conclusions that relate to the review questions and objectives.                                                                           | Abstract                                                           |
|       | Introduction                     |                                                                                                                                                                                                                                                                                                         |                                                                    |
| 3     | Rationale                        | Describe the rationale for the review in the context of what is already known. Explain why the review questions/objectives lend themselves to a scoping review approach.                                                                                                                                | Pages 1 and 2 (Introduction)                                       |
| 4     | Objectives                       | Provide an explicit statement of the questions and objectives being addressed with reference to their key elements (e.g., population or participants, concepts, and context) or other relevant key elements used to conceptualize the review questions and/or objectives                                | Page 2 (Introduction)                                              |
|       | Methods                          |                                                                                                                                                                                                                                                                                                         |                                                                    |
| 5     | Protocol/Registration            | Indicate whether a review protocol exists; state if and where it can be accessed (eg, a Web address); and if available, provide registration information, including the registration number.                                                                                                            | No protocol registration. Protocol spelled out in methods section. |
| 6     | Eligibility Criteria             | Specify characteristics of the sources of evidence used as eligibility criteria (eg, years considered, language, and publication status), and provide a rationale.                                                                                                                                      | Pages 4 (Methods, Eligibility Criteria)                            |
| 7     | Information Sources              | Describe all information sources in the search (eg, databases with dates of coverage and contact with authors to identify additional sources), as well as the date the most recent search was executed.                                                                                                 | Pages 3 (Methods, Search Strategy)                                 |
| 8     | Search                           | Present the full electronic search strategy for at least 1 database, including any limits used, such that it could be repeated.                                                                                                                                                                         | Supplement 1                                                       |
| 9     | Selection of Sources of Evidence | State the process for selecting sources of evidence (ie, screening and eligibility) included in the scoping review.                                                                                                                                                                                     | Pages 3 and 4 (Methods, Search Strategy & Eligibility Criteria)    |
| 10    | Data Charting Process            | Describe the methods of charting data from the included sources of evidence (eg, calibrated forms or forms that have been tested by the team before their use, and whether data charting was done independently or in duplicate) and any processes for obtaining and confirming data from investigators | Pages 4 and 5 (Methods, Data Extraction)                           |

| Items      | Section                                       | PRISMA-ScR Checklist Item                                                                                                                                                                             | Reported                                                               |
|------------|-----------------------------------------------|-------------------------------------------------------------------------------------------------------------------------------------------------------------------------------------------------------|------------------------------------------------------------------------|
| 11         | Data Items                                    | List and define all variables for which data were sought and any assumptions and simplifications made.                                                                                                | Pages 4 and 5 (Methods, Data, Extraction)<br><a href="#">Table 1</a> . |
| 12         | Critical Appraisal of Sources of Evidence     | If done, provide a rationale for conducting a critical appraisal of included sources of evidence; describe the methods used and how this information was used in any data synthesis (if appropriate). | Page 5 (Methods, Critical Appraisal)                                   |
| 13         | Synthesis of Results                          | Describe the methods of handling and summarizing the data that were charted.                                                                                                                          | Pages 5 and 6 (Methods, Synthesis of Results)                          |
| Results    |                                               |                                                                                                                                                                                                       |                                                                        |
| 14         | Selection of Sources of Evidence              | Give numbers of sources of evidence screened, assessed for eligibility, and included in the review, with reasons for exclusions at each stage, ideally using a flow diagram.                          | Pages 6 (Results, Selection of Sources)                                |
| 15         | Characteristics of Sources of Evidence        | For each source of evidence, present characteristics for which data were charted and provide the citations.                                                                                           | Pages 6 and 7 (Results, Characteristics)                               |
| 16         | Critical Appraisal Within Sources of Evidence | If done, present data on critical appraisal of included sources of evidence (see item 12).                                                                                                            | Pages 7 and 8 (Results, Critical Appraisal)                            |
| 17         | Results of Individuals Sources of Evidence    | For each included source of evidence, present the relevant data that were charted that relate to the review questions and objectives.                                                                 | <a href="#">Table 1</a>                                                |
| 18         | Synthesis of Results                          | Summarize and/or present the charting results as they relate to the review questions and objectives.                                                                                                  | Pages 8, 9, and 10, <a href="#">Table 2</a> (Results, Synthesis)       |
| Discussion |                                               |                                                                                                                                                                                                       |                                                                        |
| 19         | Summary of Evidence                           | Summarize the main results (including an overview of concepts, themes, and types of evidence available), link to the review questions and objectives, and consider the relevance to key groups.       | Pages 10 and 11, (Discussion, Summary of Evidence)                     |
| 20         | Strengths/ Limitations                        | Discuss the limitations of the scoping review process.                                                                                                                                                | Pages 13 and 14, (Discussion, Summary of Evidence)                     |
| 21         | Conclusions                                   | Provide a general interpretation of the results with respect to the review questions and objectives, as well as potential implications and/or next steps.                                             | Page 14 (Conclusion and Implications)                                  |
| Funding    |                                               |                                                                                                                                                                                                       |                                                                        |

| <b>Items</b> | <b>Section</b> | <b>PRISMA-ScR Checklist Item</b>                                                                                                                                                | <b>Reported</b> |
|--------------|----------------|---------------------------------------------------------------------------------------------------------------------------------------------------------------------------------|-----------------|
| 22           | Funding        | Describe sources of funding for the included sources of evidence, as well as sources of funding for the scoping review. Describe the role of the funders of the scoping review. | Title Page.     |
